# Supplementary material for: UK Medical Cannabis Registry: a case series analyzing clinical outcomes of medical cannabis therapy for generalized anxiety disorder patients
Source: PubMed Central journal article supplement (PMC11424060; doi:10.1097/yic.0000000000000536), 2024-02-02
Supplement: icp-39-350-s001.pdf [file icp-39-350-s001.pdf]

## Supplemental Digital Content:

**Table A.** Primary, secondary, and tertiary indications for being prescribed cannabis-based medicinal products (n=120)

| Indication                               | Primary<br>n (%) | Secondary<br>n (%) | Tertiary<br>n (%) |
|------------------------------------------|------------------|--------------------|-------------------|
| Anxiety                                  | 120 (100%)       | -                  | -                 |
| Agoraphobia                              | -                | 2 (1.7%)           | 1 (0.8%)          |
| Attention deficit hyperactivity disorder | -                | 3 (2.5%)           | 0 (0.0%)          |
| Autistic spectrum disorder               | -                | 2 (1.7%)           | 2 (1.7%)          |
| Cancer pain                              | -                | 1 (0.8%)           | 0 (0.0%)          |
| Chronic pain                             | -                | 2 (1.7%)           | 2 (1.7%)          |
| Depression                               | -                | 24 (20.0%)         | 4 (3.3%)          |
| Eating disorder                          | -                | 1 (0.8%)           | 2 (1.7%)          |
| Fibromyalgia                             | -                | 1 (0.8%)           | 0 (0.0%)          |
| Headache                                 | -                | 1 (0.8%)           | 0 (0.0%)          |
| Insomnia                                 | -                | 7 (5.8%)           | 4 (3.3%)          |
| Obsessive compulsive disorder            | -                | 2 (1.7%)           | 0 (0.0%)          |
| Panic disorder                           | -                | 1 (0.8%)           | 0 (0.0%)          |
| Parkinson's disease                      | -                | 1 (0.8%)           | 0 (0.0%)          |
| Post-traumatic stress disorder           | -                | 3 (2.5%)           | 1 (0.8%)          |

**Table B.** Comorbidity frequencies of study participants (n=120)

| <b>Comorbidity</b>                           | <b>n (%) / median (IQR)</b> |
|----------------------------------------------|-----------------------------|
| Myocardial infarction                        | 0 (0.0%)                    |
| Congestive heart failure                     | 1 (0.8%)                    |
| Peripheral vascular disease                  | 0 (0.0%)                    |
| Cerebrovascular accident or ischaemic attack | 0 (0.0%)                    |
| Dementia                                     | 1 (0.8%)                    |
| Chronic obstructive pulmonary disease        | 2 (1.7%)                    |
| Connective tissue disease                    | 1 (0.8%)                    |
| Peptic ulcer disease                         | 2 (1.7%)                    |
| Liver disease                                | 1 (0.8%)                    |
| Diabetes                                     | 2 (1.7%)                    |
| Hemiplegia                                   | 0 (0.0%)                    |
| Moderate to severe chronic kidney disease    | 3 (2.5%)                    |
| Solid tumour                                 |                             |
| Localised                                    | 3 (2.5%)                    |
| Metastatic                                   | 1 (0.8%)                    |
| Leukaemia                                    | 0 (0.0%)                    |
| Lymphoma                                     | 0 (0.0%)                    |
| AIDS                                         | 0 (0.0%)                    |
| Charlson Comorbidity Index score             | 0.00 (0.00-1.00)            |
| Hypertension                                 | 11 (9.2%)                   |
| Arthritis                                    | 1 (0.8%)                    |
| Epilepsy                                     | 2 (1.7%)                    |
| Venous thromboembolism                       | 1 (0.8%)                    |
| Endocrine/thyroid dysfunction                | 4 (3.3%)                    |

**Table C.** Univariate analysis assessing association between variables and the likelihood of experiencing a clinically significant benefit in GAD-7 at 12 months. Significant differences are denoted by asterisks (\*:  $p < 0.050$ , \*\*  $p, 0.010$  and \*\*\*:  $p < 0.001$ )

| Variable                                  | n  | OR (95% CI)          | p-value |
|-------------------------------------------|----|----------------------|---------|
| <b>Age</b>                                |    |                      |         |
| <30                                       | 30 | 1                    |         |
| 31-40                                     | 46 | 1.033 (0.349-3.053)  | 0.954   |
| 41-50                                     | 24 | 2.347 (0.727-7.579)  | 0.154   |
| 51-60                                     | 12 | 1.095 (0.231-5.195)  | 0.909   |
| 60+                                       | 8  | 0.469 (0.049-4.497)  | 0.512   |
| <b>Gender</b>                             |    |                      |         |
| Male                                      | 74 | 1                    |         |
| Female                                    | 46 | 0.793 (0.341-1.847)  | 0.793   |
| <b>Body Mass Index (kg/m<sup>2</sup>)</b> |    |                      |         |
| <25                                       | 44 | 1                    |         |
| 25-30                                     | 37 | 0.964 (0.350-2.660)  | 0.944   |
| 30-35                                     | 12 | 1.500 (0.377-5.966)  | 0.565   |
| >35                                       | 16 | 2.333 (0.702-7.751)  | 0.167   |
| <b>Prior Cannabis Usage Status</b>        |    |                      |         |
| Current user                              | 59 | 1                    |         |
| Ex-user                                   | 31 | 1.330 (0.481-3.675)  | 0.582   |
| Never used                                | 30 | 1.143 (0.356-3.673)  | 0.823   |
| <b>CBMP Prescription</b>                  |    |                      |         |
| Oils                                      | 38 | 1                    |         |
| Dried flower                              | 52 | 3.800 (1.269-11.381) | 0.017*  |
| Both                                      | 30 | 2.400 (0.694-8.300)  | 0.167   |
| <b>CBD Contents in CBMP</b>               |    |                      |         |
| No CBD                                    | 15 | 1                    |         |
| ≤ Median dose of cohort (≤31.25mg/day)    | 45 | 4.333 (0.872-21.543) | 0.073   |
| > Median dose of cohort (>31.25mg/day)    | 60 | 1.625 (0.332-8.191)  | 0.556   |
| <b>THC Contents in CBMP</b>               |    |                      |         |
| ≤ Median dose of cohort (≤100.00mg/day)   | 45 | 1                    |         |
| > Median dose of cohort (>100.00mg/day)   | 75 | 2.714 (1.062-6.937)  | 0.037*  |
| <b>Baseline GAD-7 score</b>               |    |                      |         |
| 0-9 (minimal or mild)                     | 27 | 1                    |         |
| 10-14 (moderate)                          | 32 | 1.610 (0.416-6.227)  | 0.490   |
| 15-21 (severe)                            | 61 | 3.019 (0.922-9.882)  | 0.068   |
| <b>Baseline SQS score</b>                 |    |                      |         |
| ≤ 3 (sleep impaired)                      | 69 | 1                    |         |
| > 3 (non-sleep impaired)                  | 51 | 0.900 (0.396-2.048)  | 0.802   |

**Table D.** Frequency of changes in prescription of antidepressants, benzodiazepines and insomnia-related medication

| Medication       | Total | No Change   | Stopped Taking | Reduced Dose | Increased dose | New Medication |
|------------------|-------|-------------|----------------|--------------|----------------|----------------|
| Antidepressants  | 77    | 62 (80.52%) | 6 (7.79%)      | 4 (5.19%)    | 1 (1.30%)      | 4 (5.19%)      |
| Benzodiazepines  | 24    | 19 (79.17%) | 3 (12.50%)     | 1 (4.17%)    | 0 (0.00%)      | 1 (4.17%)      |
| Insomnia-related | 9     | 7 (77.78%)  | 0 (0.00%)      | 0 (0.00%)    | 0 (0.00%)      | 2 (22.22%)     |
